# Supplementary material
Source: Springer Nature journal article supplement (https://www.springermedizin.de/resource/supplementary/12874_2011_608_MOESM3_ESM.pdf/9432246)
Supplement: MOESM3 [file 9432246]

Martingale Residual

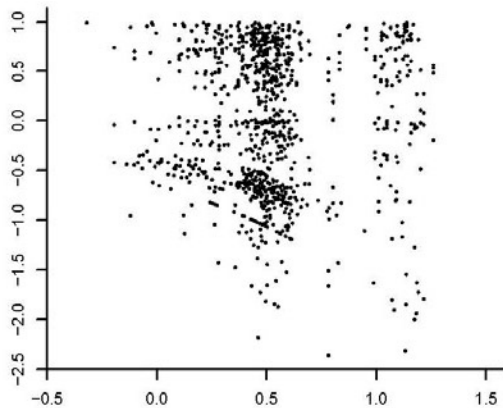

Risk Score

Martingale Residual

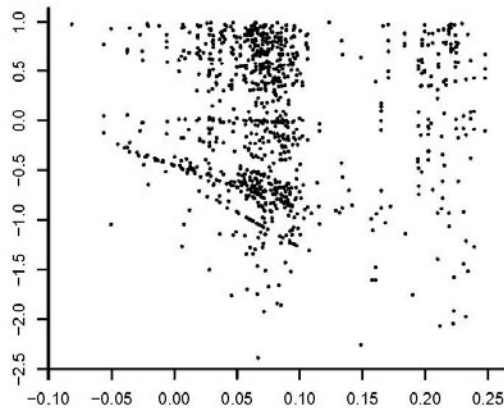

Risk Score

Deviance Residual

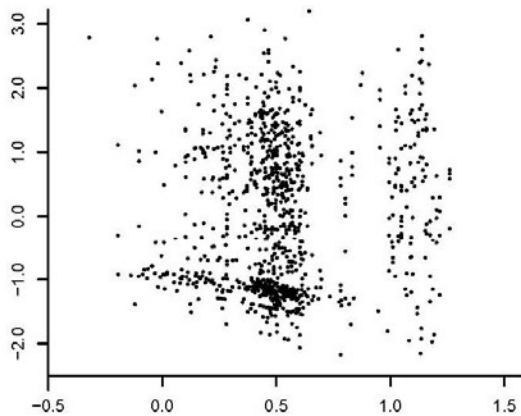

Risk Score

Deviance Residual

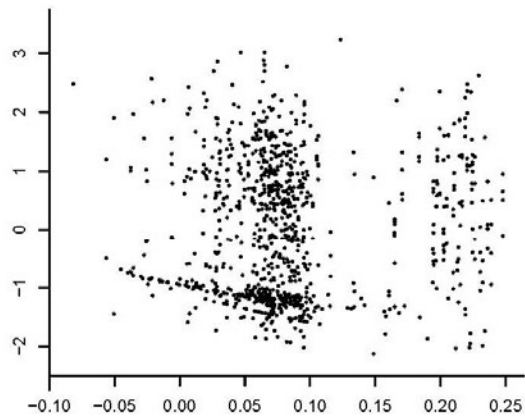

Risk Score
